# Supplementary material for: Synthesis of arsenic-rich Asn ligand complexes from yellow arsenic
Source: Royal Society of Chemistry journal article supplement (doi:10.1039/c4sc03543g), 2014-11-28
Supplement: c4sc03543g2.pdf [file c4sc03543g2.pdf]

## Supporting Information for:

# Synthesis of arsenic-rich $As_n$ ligand complexes from yellow arsenic

C. Graßl, M. Bodensteiner, M. Zabel and M. Scheer

Institut für Anorganische Chemie der Universität Regensburg, D-93040 Regensburg, *Germany*

## Contents

|                                                     |    |
|-----------------------------------------------------|----|
| General Procedures and Starting Materials .....     | 2  |
| Experimental Section .....                          | 2  |
| Synthesis of 1 at 70°C .....                        | 2  |
| Synthesis of 1, 2 and 3 at room temperature .....   | 2  |
| Crystal Data for 1. ....                            | 8  |
| Crystal Data for 1*DCM. ....                        | 10 |
| Crystal Data for 2*4DCM. ....                       | 12 |
| Crystal Data for 2. ....                            | 13 |
| Crystal Data for 3. ....                            | 15 |
| Selected Bond Distances and Angles for 2*4DCM ..... | 17 |
| Selected Bond Distances and Angles for 2.....       | 18 |
| Selected Bond Distances and Angles for 3.....       | 19 |
| References .....                                    | 20 |

## General Procedures and Starting Materials

All reactions were performed under an atmosphere of dry argon with standard vacuum, Schlenk and glove box techniques. Solvents were purified and degassed by standard procedures. Mass spectra were recorded on a Finnigan MAT SSQ 710 A mass spectrometer. NMR spectra were recorded at 25°C on a Bruker Avance 400 [<sup>1</sup>H: 400.132 MHz standard tetramethylsilane, <sup>13</sup>C: 100.627 MHz standard tetramethylsilane] or on a Bruker Avance 300 [<sup>1</sup>H: 300.130 MHz standard tetramethylsilane, <sup>13</sup>C: 75.468 MHz standard tetramethylsilane]. The chemical shifts are reported relative to tetramethylsilane (<sup>1</sup>H, <sup>13</sup>C).

## Experimental Section

### Synthesis of **1** at 70°C

Freshly prepared As<sub>4</sub><sup>1</sup> (excess) solution (300 mL) in toluene was kept at 70°C and [ $\{\eta^5\text{-Cp}^{\text{---}}\text{Co}\}_2\text{-}\mu\text{-}\{\eta^{4:4}\text{-toluene}\}\}^2$  (0.560 g, 0.83 mmol) was added in toluene (50 mL) in the darkness. The solution was stirred for two hours at 70°C yielding a green solution. The solvent was removed completely under vacuum. The residue was extracted with dichloromethane and filtrated over diatomaceous earth. **1** was yielded as green powder (600 mg, 0.68mmol, 82%).

### Synthesis of **1**, **2** and **3** at room temperature

Freshly prepared As<sub>4</sub><sup>1</sup> (excess) solution (300 mL) in toluene was cooled down to room temperature and [ $\{\eta^5\text{-Cp}^{\text{---}}\text{Co}\}_2\text{-}\mu\text{-}\{\eta^{4:4}\text{-toluene}\}\}^2$  (0.350 g, 0.5 mmol) was added in toluene (50 mL) in the darkness. The solution was stirred for two hours at room temperature. The solvent was removed completely under vacuum. The residue was extracted with 10 mL of dichloromethane, 2g of silica was added and the solvent was evaporated from the mixture in vacuum until it was free-flowing. Column chromatography (column: 25 x 3 cm, silica, temperature: -20°C) with hexane/toluene (9:1) a green fraction (240 mg, 54%) of **1** followed by a brown zone containing 120 mg (14%) of **3**. Finally elution of a brown zone with tetrahydrofuran yielded a fraction from which 77 mg (8 %) of **2** was isolated.

#### Analytical Data for **1**:

<sup>1</sup>H-NMR (300 MHz, CD<sub>2</sub>Cl<sub>2</sub>, 300K): 1.29 (s, 9 H, C(CH<sub>3</sub>)<sub>3</sub>), 1.42 (s, 18 H, C(CH<sub>3</sub>)<sub>3</sub>), 4.25 (s, 2 H, CH);

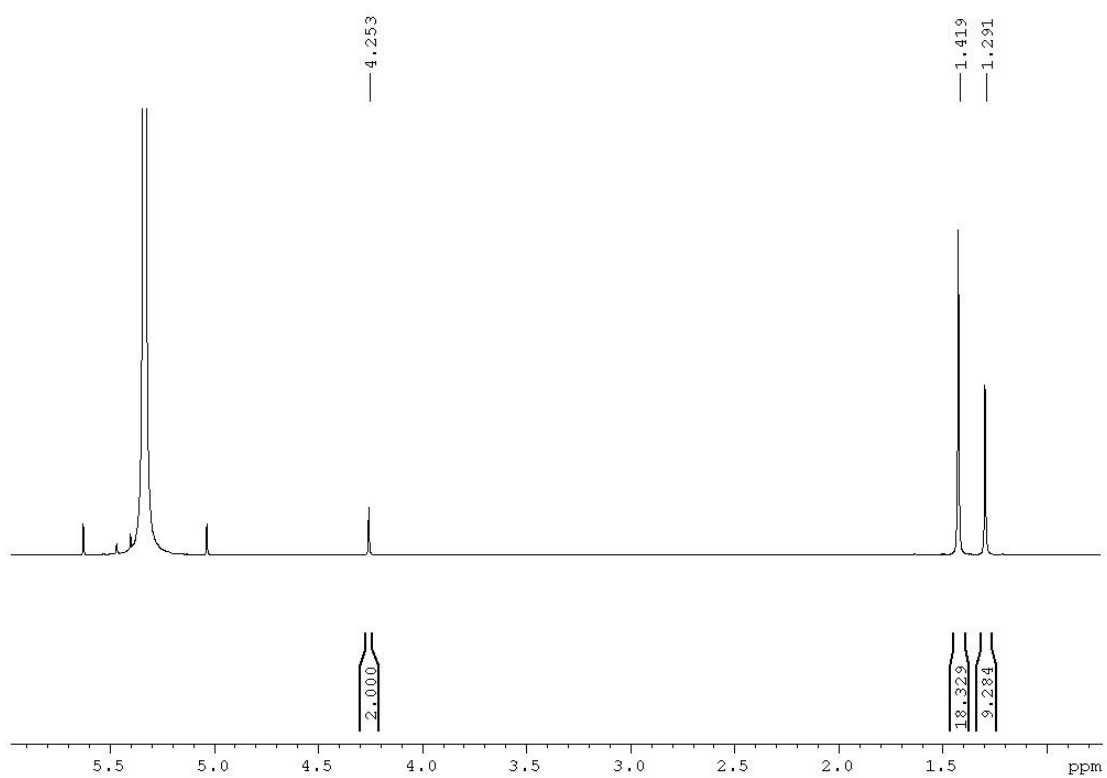

**Figure S1:**  $^1\text{H}$ -NMR of **1** in  $\text{CD}_2\text{Cl}_2$ .

$^{13}\text{C}\{^1\text{H}\}$ -NMR (300 MHz,  $\text{CD}_2\text{Cl}_2$ , 300K): 31.8 (s,  $\text{C}(\text{CH}_3)_3$ ), 32.1 (s,  $\text{CH}_3$ ), 33.8 (s,  $\text{C}(\text{CH}_3)_3$ ), 34.4 (s,  $\text{CH}_3$ ), 79.2 (s,  $\text{C}(\text{CH}_3)_3$ ), 106.3 (s, CH), 107.6 (s,  $\text{C}(\text{CH}_3)_3$ );

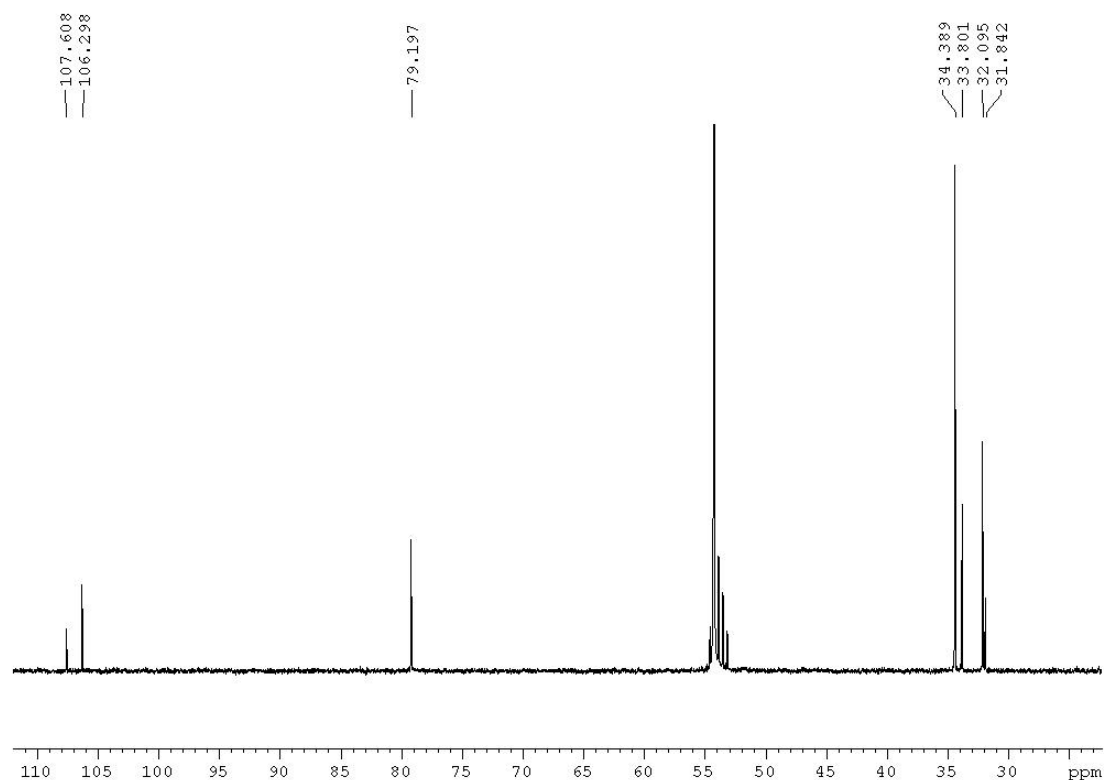

**Figure S2:**  $^{13}\text{C}$ -NMR of **1** in  $\text{CD}_2\text{Cl}_2$ .

**MS (FDI):**  $m/z$  (%): 883.6 (100)  $[\text{M}^+]$ ; **Calculated (%) for  $\text{C}_{34}\text{H}_{58}\text{Co}_2\text{As}_4$**  (884.01 g/mol) C 46.18, H 6.61; found: C 45.96, H 6.92.

**Analytical Data for 2:**

**$^1\text{H}$  NMR (300 MHz,  $\text{CD}_2\text{Cl}_2$ , 300K):** 1.05 (br s, 9 H,  $\text{C}(\text{CH}_3)_3$ ), 1.12 (br s, 9 H,  $\text{C}(\text{CH}_3)_3$ ), 1.25 (br s, 18 H,  $\text{C}(\text{CH}_3)_3$ ), 1.43 (br s, 18 H,  $\text{C}(\text{CH}_3)_3$ ), 4.25 (s, 1 H, CH), 4.28 (s, 2 H, CH), 4.30 (s, 2 H, CH), 5.03 (br s, 2 H, CH);

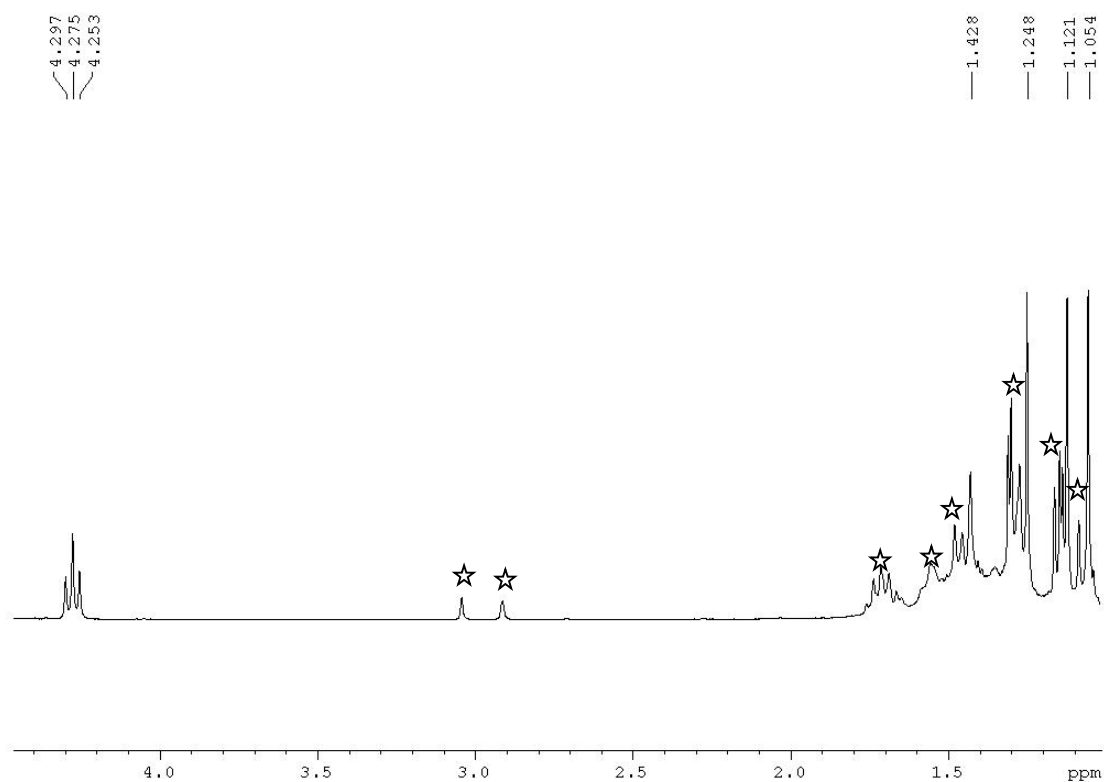

**Figure S3:**  $^1\text{H}$ -NMR of **2** in  $\text{CD}_2\text{Cl}_2$ . Signals marked with a star are impurities which cannot be removed through column chromatographic workup.

**MS (FDI):**  $m/z$  (%): 1918.4 (100)  $[\text{M}^+]$ , 1326.3 (100)  $[\text{M}^+ - \text{Cp}''' \text{CoAs}_4]$ , 884.2 (100)  $[\text{M}^+ - (\text{Cp}''' \text{Co})_2 \text{As}_6]$ ;

**Calculated (%) for  $\text{C}_{68}\text{H}_{116}\text{Co}_4\text{As}_{10}$**  (1917.86 g/mol) C 42.57, H 6.09; found: C 42.73, H 6.22.

#### Analytical Data for **3**:

**$^1\text{H}$ -NMR (400 MHz,  $\text{CD}_2\text{Cl}_2$ , 300K):** 1.07 (s, 9 H,  $\text{C}(\text{CH}_3)_3$ ), 1.30 (s, 9 H,  $\text{C}(\text{CH}_3)_3$ ), 1.39 (s, 18 H,  $\text{C}(\text{CH}_3)_3$ ), 1.42 (s, 9 H,  $\text{C}(\text{CH}_3)_3$ ), 1.43 (s, 18 H,  $\text{C}(\text{CH}_3)_3$ ), 1.55 (s, 18 H,  $\text{C}(\text{CH}_3)_3$ ), 4.36 (s, 2 H, CH), 4.80 (s, 2 H, CH), 5.03 (s br, 2H, CH);

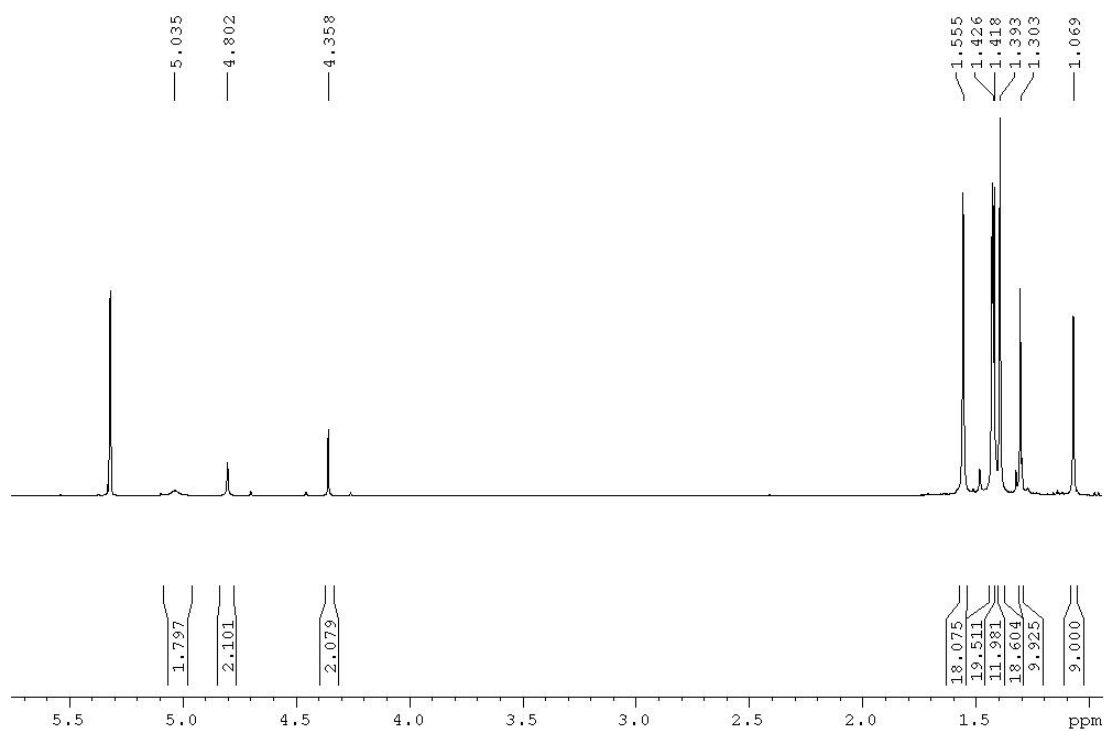

**Figure S4:**  $^1\text{H}$ -NMR of **3** in  $\text{CD}_2\text{Cl}_2$ .

**$^{13}\text{C}\{^1\text{H}\}$ -NMR (400 MHz,  $\text{CD}_2\text{Cl}_2$ , 300K):** 31.8 (s,  $\text{C}(\text{CH}_3)_3$ ), 32.2 (s,  $\text{C}(\text{CH}_3)_3$ ), 32.5 (s br,  $\text{C}(\text{CH}_3)_3$ ), 32.8 (s,  $\text{CH}_3$ ), 33.5 (s,  $\text{CH}_3$ ), 33.7 (s,  $\text{CH}_3$ ), 33.8 (s,  $\text{C}(\text{CH}_3)_3$ ), 33.9 (s,  $\text{C}(\text{CH}_3)_3$ ), 34.2 (s br,  $\text{C}(\text{CH}_3)_3$ ), 34.3 (s,  $\text{CH}_3$ ), 34.4 (s,  $\text{CH}_3$ ), 34.7 (s,  $\text{CH}_3$ ), 79.2 (s,  $\text{C}(\text{CH}_3)_3$ ), 82.2 (s,  $\text{C}(\text{CH}_3)_3$ ), 82.6 (s,  $\text{C}(\text{CH}_3)_3$ ), 85.8 (s,  $\text{C}(\text{CH}_3)_3$ ), 107.4 (s, CH), 109.1 (s, CH), 110.1 (s, CH), 112.8 (s,  $\text{C}(\text{CH}_3)_3$ ), 113.6 (s,  $\text{C}(\text{CH}_3)_3$ );

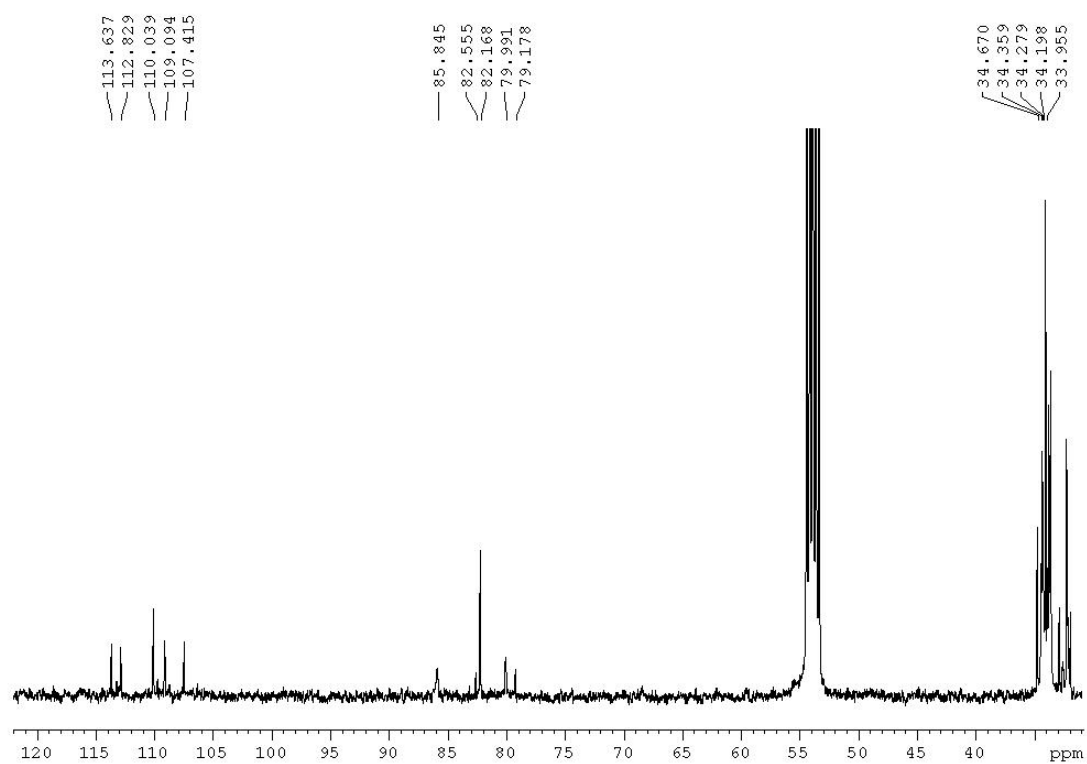

**Figure S5:**  $^{13}\text{C}$ -NMR of **3** in  $\text{CD}_2\text{Cl}_2$ .

**MS (FDI):**  $m/z$  (%): 1775.5 (100)  $[\text{M}^+]$ , 1033.9 (40)  $[\text{M}^+-\text{Cp}'''\text{CoAs}_6]$ , 884.3 (68)  $[\text{M}^+-\text{Cp}''\text{CoAs}_8]$ , 662.9 (100)  $[\text{M}^+-\text{Cp}'''\text{CoAs}_{11}]$ ; **Calculated (%) for  $\text{C}_{51}\text{H}_{87}\text{Co}_3\text{As}_{12}$**  (1775.54 g/mol) C 34.49, H 4.94; found: C 34.81, H 4.91.

## Crystal Data for 1.

**Experimental.** Single green block-shaped crystals of (**1**) were recrystallized from a saturated hexane solution at -25°C. A suitable crystal ( $0.23 \times 0.12 \times 0.08 \text{ mm}^3$ ) was selected and mounted on a MITIGEN holder oil on an Aigent Technologies (formerly Oxford Diffraction) Gemini R Ultra diffractometer. Using **Olex2**,<sup>3</sup> the structure was solved with the **SIR-97**<sup>4</sup> structure solution program, using the Direct Methods solution method. The model was refined with version 2014/6 of **ShelXL**<sup>5</sup> using Least Squares minimization. Absorption correction was applied empirically using SCALE3 program implemented to *CrysAlis PRO* software.

**Crystal Data.**  $\text{C}_{34}\text{H}_{58}\text{As}_4\text{Co}_2$ ,  $M_r = 884.34$ , monoclinic,  $\text{P2}_1/\text{n}$  (No. 14),  $a = 8.43860(10) \text{ \AA}$ ,  $b = 13.76760(10) \text{ \AA}$ ,  $c = 16.02760(10) \text{ \AA}$ ,  $\beta = 100.2700(10)^\circ$ ,  $\alpha = \gamma = 90^\circ$ ,  $V = 1832.24(3) \text{ \AA}^3$ ,  $T = 123(2) \text{ K}$ ,  $Z = 2$ ,  $Z' = 0.5$ ,  $\mu(\text{CuK}\alpha) = 11.249$ , 19971 reflections measured, 3181 unique ( $R_{\text{int}} = 0.0879$ ) which were used in all calculations. The final  $wR_2$  was 0.0926 (all data) and  $R_I$  was 0.0331 ( $I > 2(I)$ ).

| Compound                     | 1                                                               |
|------------------------------|-----------------------------------------------------------------|
| CCDC                         | 1028573                                                         |
| Formula                      | C <sub>34</sub> H <sub>58</sub> As <sub>4</sub> Co <sub>2</sub> |
| $D_{calc.}/\text{g cm}^{-3}$ | 1.603                                                           |
| $\mu/\text{mm}^{-1}$         | 11.249                                                          |
| Formula Weight               | 884.34                                                          |
| Colour                       | green                                                           |
| Shape                        | block                                                           |
| Max Size/mm                  | 0.23                                                            |
| Mid Size/mm                  | 0.12                                                            |
| Min Size/mm                  | 0.08                                                            |
| $T/\text{K}$                 | 123(2)                                                          |
| Crystal System               | monoclinic                                                      |
| Space Group                  | P2 <sub>1</sub> /n                                              |
| $a/\text{\AA}$               | 8.4386(1)                                                       |
| $b/\text{\AA}$               | 13.7676(1)                                                      |
| $c/\text{\AA}$               | 16.0276(1)                                                      |
| $\alpha^\circ$               | 90                                                              |
| $\beta^\circ$                | 100.270(1)                                                      |
| $\gamma^\circ$               | 90                                                              |
| $V/\text{\AA}^3$             | 1832.24(3)                                                      |
| $Z$                          | 2                                                               |
| $Z'$                         | 0.5                                                             |
| $\Theta_{min}^\circ$         | 4.263                                                           |
| $\Theta_{max}^\circ$         | 66.683                                                          |
| Measured Refl.               | 19971                                                           |
| Independent Refl.            | 3181                                                            |
| Reflections Used             | 3018                                                            |
| $R_{int}$                    | 0.0879                                                          |
| Parameters                   | 181                                                             |
| Restraints                   | 0                                                               |
| Largest Peak                 | 0.900                                                           |
| Deepest Hole                 | -0.871                                                          |
| GooF                         | 1.052                                                           |
| $wR_2$ (all data)            | 0.0926                                                          |
| $wR_2$                       | 0.0915                                                          |
| $R_I$ (all data)             | 0.0348                                                          |
| $R_I$                        | 0.0331                                                          |

## Crystal Data for 1\*CH<sub>2</sub>Cl<sub>2</sub>.

**Experimental.** Single green block-shaped crystals of 1\* CH<sub>2</sub>Cl<sub>2</sub> were recrystallized from a saturated CH<sub>2</sub>Cl<sub>2</sub> solution at -25°C. A suitable crystal (0.58 × 0.37 × 0.35 mm<sup>3</sup>) was selected and mounted on a MITIGEN holder oil on an Agilent Technologies (formerly Oxford Diffraction) Gemini R Ultra diffractometer. Using **Olex2**,<sup>3</sup> the structure was solved with the **SIR-97**<sup>4</sup> structure solution program, using the Direct Methods solution method. The model was refined with version 2014/6 of **ShelXL**<sup>5</sup> using Least Squares minimization. Absorption correction was applied empirically using SCALE3 program implemented to *CrysAlis PRO* software. For the refinement of the disorder solvent CH<sub>2</sub>Cl<sub>2</sub> molecule (90:10) displacement parameter restraints (SIMU) were applied.

**Crystal Data.** C<sub>35</sub>H<sub>60</sub>As<sub>4</sub>Cl<sub>2</sub>Co<sub>2</sub>,  $M_r = 969.27$ , monoclinic, C2/c (No. 15),  $a = 17.8930(10)$  Å,  $b = 19.9249(11)$  Å,  $c = 11.6299(5)$  Å,  $\beta = 107.903(5)^\circ$ ,  $\alpha = \gamma = 90^\circ$ ,  $V = 3945.5(4)$  Å<sup>3</sup>,  $T = 123(2)$  K,  $Z = 4$ ,  $Z' = 0.5$ ,  $\mu(\text{MoK}\alpha) = 4.329$ , 13850 reflections measured, 6515 unique ( $R_{int} = 0.0241$ ) which were used in all calculations. The final  $wR_2$  was 0.0998 (all data) and  $R_1$  was 0.0387 ( $I > 2(I)$ ).

| Compound                     | 1*CH <sub>2</sub> Cl <sub>2</sub>                                               |
|------------------------------|---------------------------------------------------------------------------------|
| CCDC                         | 1028574                                                                         |
| Formula                      | C <sub>35</sub> H <sub>60</sub> As <sub>4</sub> Cl <sub>2</sub> Co <sub>2</sub> |
| $D_{calc.}/\text{g cm}^{-3}$ | 1.632                                                                           |
| $\mu/\text{mm}^{-1}$         | 4.329                                                                           |
| Formula Weight               | 969.27                                                                          |
| Colour                       | green                                                                           |
| Shape                        | block                                                                           |
| Max Size/mm                  | 0.58                                                                            |
| Mid Size/mm                  | 0.37                                                                            |
| Min Size/mm                  | 0.35                                                                            |
| $T/\text{K}$                 | 123(2)                                                                          |
| Crystal System               | monoclinic                                                                      |
| Space Group                  | C2/c                                                                            |
| $a/\text{\AA}$               | 17.8930(10)                                                                     |
| $b/\text{\AA}$               | 19.9249(11)                                                                     |
| $c/\text{\AA}$               | 11.6299(5)                                                                      |
| $\alpha^\circ$               | 90                                                                              |
| $\beta^\circ$                | 107.903(5)                                                                      |
| $\gamma^\circ$               | 90                                                                              |
| $V/\text{\AA}^3$             | 3945.5(4)                                                                       |
| $Z$                          | 4                                                                               |
| $Z'$                         | 0.5                                                                             |
| $\Theta_{min}^\circ$         | 2.686                                                                           |
| $\Theta_{max}^\circ$         | 32.651                                                                          |
| Measured Refl.               | 13850                                                                           |
| Independent Refl.            | 6515                                                                            |
| Reflections used             | 5548                                                                            |
| $R_{int}$                    | 0.0241                                                                          |
| Parameters                   | 204                                                                             |
| Restraints                   | 12                                                                              |
| Largest Peak                 | 1.679                                                                           |
| Deepest Hole                 | -0.865                                                                          |
| GooF                         | 1.087                                                                           |
| $wR_2$ (all data)            | 0.0998                                                                          |
| $wR_2$                       | 0.0948                                                                          |
| $R_1$ (all data)             | 0.0490                                                                          |
| $R_1$                        | 0.0387                                                                          |

## Crystal Data for 2\*4 CH<sub>2</sub>Cl<sub>2</sub>.

**Experimental.** Single black block-shaped crystals of (2\*4 CH<sub>2</sub>Cl<sub>2</sub>) were recrystallized from a saturated CH<sub>2</sub>Cl<sub>2</sub> solution at -25°C. A suitable crystal (0.15 × 0.10 × 0.04 mm<sup>3</sup>) was selected and mounted on a MITIGEN holder oil on an Agilent Technologies (formerly Oxford diffraction) Gemini R Ultra diffractometer. Using **Olex2**,<sup>3</sup> the structure was solved with the **SIR-97**<sup>4</sup> structure solution program, using the direct methods solution method. The model was refined with version 2014/6 of **ShelXL**<sup>5</sup> using by full matrix least squares on **F**<sup>2</sup> minimization. Absorption correction was applied empirically using SCALE3 program implemented to *CrysAlis PRO* software. Distance and displacement parameter restraints (DFIX, SIMU) were applied to the two solvent CH<sub>2</sub>Cl<sub>2</sub> molecules. The third solvent CH<sub>2</sub>Cl<sub>2</sub> is located at the inversion center and could not be modelled. Therefore the Squeeze<sup>6</sup> function of the Platon<sup>7</sup> software was applied to back calculate its contribution to the structure factors.

**Crystal Data.** C<sub>72</sub>H<sub>124</sub>As<sub>10</sub>Cl<sub>8</sub>Co<sub>4</sub>,  $M_r = 2258.22$ , triclinic, P-1 (No. 2),  $a = 13.7956(8)\text{\AA}$ ,  $b = 14.0892(8)\text{\AA}$ ,  $c = 15.0382(10)\text{\AA}$ ,  $\alpha = 62.971(6)^\circ$ ,  $\beta = 69.895(6)^\circ$ ,  $\gamma = 61.292(6)^\circ$ ,  $V = 2254.0(1)\text{\AA}^3$ ,  $T = 123(2)\text{ K}$ ,  $Z = 1$ ,  $Z' = 0.5$ ,  $\mu(\text{CuK}\alpha) = 12.199$ , 11135 reflections measured, 6133 unique ( $R_{\text{int}} = 0.0672$ ) which were used in all calculations. The final  $wR_2$  was 0.1770 (all data) and  $R_I$  was 0.0787 ( $I > 2(I)$ ).

| Compound                                       | 2*4 CH <sub>2</sub> Cl <sub>2</sub>                              |
|------------------------------------------------|------------------------------------------------------------------|
| CCDC                                           | 1028576                                                          |
| Temperature/K                                  | 123(1)                                                           |
| Crystal system                                 | triclinic                                                        |
| Space group                                    | P-1                                                              |
| a/ $\text{\AA}$                                | 13.7956(8)                                                       |
| b/ $\text{\AA}$                                | 14.0892(8)                                                       |
| c/ $\text{\AA}$                                | 15.0382(10)                                                      |
| $\alpha/^\circ$                                | 62.971(6)                                                        |
| $\beta/^\circ$                                 | 69.895(6)                                                        |
| $\gamma/^\circ$                                | 61.292(6)                                                        |
| Volume/ $\text{\AA}^3$                         | 2254.0(3)                                                        |
| Z                                              | 1                                                                |
| $\rho_{\text{calc}}/\text{cm}^3$               | 1.664                                                            |
| $\mu/\text{mm}^{-1}$                           | 12.199                                                           |
| F(000)                                         | 1130.0                                                           |
| Crystal size/ $\text{mm}^3$                    | 0.15 × 0.1 × 0.035                                               |
| Radiation                                      | CuK $\alpha$ ( $\lambda = 1.54184$ )                             |
| 2 $\Theta$ range for data collection/ $^\circ$ | 6.686 to 124.232                                                 |
| Index ranges                                   | -15 ≤ h ≤ 15, -14 ≤ k ≤ 15, -13 ≤ l ≤ 17                         |
| Reflections collected                          | 11135                                                            |
| Independent reflections                        | 6133 [ $R_{\text{int}} = 0.0672$ , $R_{\text{sigma}} = 0.0879$ ] |

|                                                |                                  |
|------------------------------------------------|----------------------------------|
| Data/restraints/parameters                     | 6133/231/452                     |
| Goodness-of-fit on $F^2$                       | 1.108                            |
| Final R indexes [ $I \geq 2\sigma(I)$ ]        | $R_1 = 0.0787$ , $wR_2 = 0.1658$ |
| Final R indexes [all data]                     | $R_1 = 0.1088$ , $wR_2 = 0.1770$ |
| Largest diff. peak/hole / $e \text{ \AA}^{-3}$ | 0.97/-1.02                       |

## Crystal Data for 2.

**Experimental.** Single black block-shaped crystals of (**2**) were recrystallised from a saturated hexane solution at 8°C. A suitable crystal ( $0.11 \times 0.10 \times 0.04 \text{ mm}^3$ ) was selected and mounted on a MITIGEN holder oil on an Agilent Technologies (formerly Oxford diffraction) SuperNova A diffractometer. Using **Olex2**,<sup>3</sup> the structure was solved with the **SIR-97**<sup>4</sup> structure solution program, using the direct methods solution method. The model was refined with version 2014/6 of **ShelXL**<sup>5</sup> using by full matrix least squares on  $F^2$  minimization. Absorption correction was applied empirically using SCALE3 program implemented to *CrysAlis PRO* software.

The crystals appeared to possess a large mosaicity. Several attempts to refine the structure including disorder failed. Therefore, we assume dynamic rotation of the tert-butyl groups, probably together with two disordered positions of the cyclopentadienyl rings.

**Crystal Data.**  $\text{C}_{68}\text{H}_{116}\text{As}_{10}\text{Co}_4$ ,  $M_r = 1918.52$ , triclinic, P-1 (No. 2),  $a = 10.3921(5) \text{ \AA}$ ,  $b = 14.3707(7) \text{ \AA}$ ,  $c = 14.8262(8) \text{ \AA}$ ,  $\alpha = 62.530(5)^\circ$ ,  $\beta = 76.535(4)^\circ$ ,  $\gamma = 79.819(4)^\circ$ ,  $V = 1904.35(19) \text{ \AA}^3$ ,  $T = 123(1) \text{ K}$ ,  $Z = 1$ ,  $Z' = 0.5$ ,  $\mu(\text{CuK}\alpha) = 11.799$ , 22490 reflections measured, 7152 unique ( $R_{int} = 0.0363$ ) which were used in all calculations. The final  $wR_2$  was 0.2212 (all data) and  $R_I$  was 0.0781 ( $I > 2(I)$ ).

| Compound                     | 2                                                                 |
|------------------------------|-------------------------------------------------------------------|
| CCDC                         | 1028575                                                           |
| Formula                      | C <sub>68</sub> H <sub>116</sub> As <sub>10</sub> Co <sub>4</sub> |
| $D_{calc.}/\text{g cm}^{-3}$ | 1.673                                                             |
| $\mu/\text{mm}^{-1}$         | 11.799                                                            |
| Formula Weight               | 1918.52                                                           |
| Colour                       | black                                                             |
| Shape                        | block                                                             |
| Max Size/mm                  | 0.11                                                              |
| Mid Size/mm                  | 0.10                                                              |
| Min Size/mm                  | 0.04                                                              |
| $T/\text{K}$                 | 123(1)                                                            |
| Crystal System               | triclinic                                                         |
| Space Group                  | P-1                                                               |
| $a/\text{\AA}$               | 10.3921(5)                                                        |
| $b/\text{\AA}$               | 14.3707(7)                                                        |
| $c/\text{\AA}$               | 14.8262(8)                                                        |
| $\alpha^\circ$               | 62.530(5)                                                         |
| $\beta^\circ$                | 76.535(4)                                                         |
| $\gamma^\circ$               | 79.819(4)                                                         |
| $V/\text{\AA}^3$             | 1904.35(19)                                                       |
| $Z$                          | 1                                                                 |
| $Z'$                         | 0.5                                                               |
| $\Theta_{min}^\circ$         | 3.411                                                             |
| $\Theta_{max}^\circ$         | 70.824                                                            |
| Measured Refl.               | 22490                                                             |
| Independent Refl.            | 7152                                                              |
| Reflections Used             | 6108                                                              |
| $R_{int}$                    | 0.0363                                                            |
| Parameters                   | 295                                                               |
| Restraints                   | 6                                                                 |
| Largest Peak                 | 1.719                                                             |
| Deepest Hole                 | -0.926                                                            |
| GooF                         | 1.072                                                             |
| $wR_2$ (all data)            | 0.2212                                                            |
| $wR_2$                       | 0.2137                                                            |
| $R_I$ (all data)             | 0.0864                                                            |
| $R_I$                        | 0.0781                                                            |

### Crystal Data for 3.

**Experimental.** Single black plate-shaped crystals of (**3**) were recrystallized from a saturated hexane solution at -25°C. A suitable crystal ( $0.07 \times 0.04 \times 0.01$  mm<sup>3</sup>) was selected and mounted on a MITIGEN holder oil on an Agilent Technologies (formerly Oxford diffraction) SuperNova A diffractometer. Using **Olex2**,<sup>3</sup> the structure was solved with the **SIR-97**<sup>4</sup> structure solution program, using the direct methods solution method. The model was refined with version 2014/6 of **ShelXL**<sup>5</sup> using by full matrix least squares on **F**<sup>2</sup> minimization. Absorption correction was applied empirically using SCALE3 program implemented to *CrysAlis PRO* software.

**Crystal Data.** C<sub>51</sub>H<sub>87</sub>As<sub>12</sub>Co<sub>3</sub>,  $M_r = 1776.03$ , monoclinic, C2/c (No. 15),  $a = 28.9202(3)$  Å,  $b = 15.78990(10)$  Å,  $c = 29.9375(3)$  Å,  $\beta = 112.7520(10)^\circ$ ,  $\alpha = \gamma = 90^\circ$ ,  $V = 12607.1(2)$  Å<sup>3</sup>,  $T = 123.00(10)$  K,  $Z = 8$ ,  $Z' = 1$ ,  $\mu(\text{CuK}\alpha) = 13.346$ , 38088 reflections measured, 11768 unique ( $R_{int} = 0.0451$ ) which were used in all calculations. The final  $wR_2$  was 0.0589 (all data) and  $R_I$  was 0.0271 ( $I > 2(I)$ ).

|                              |                                                                  |
|------------------------------|------------------------------------------------------------------|
| <b>Compound</b>              | <b>3</b>                                                         |
| CCDC                         | 1028577                                                          |
| Formula                      | C <sub>51</sub> H <sub>87</sub> As <sub>12</sub> Co <sub>3</sub> |
| $D_{calc.}/\text{g cm}^{-3}$ | 1.871                                                            |
| $\mu/\text{mm}^{-1}$         | 13.346                                                           |
| Formula Weight               | 1776.03                                                          |
| Colour                       | black                                                            |
| Shape                        | plate                                                            |
| Max Size/mm                  | 0.07                                                             |
| Mid Size/mm                  | 0.04                                                             |
| Min Size/mm                  | 0.01                                                             |
| $T/\text{K}$                 | 123(1)                                                           |
| Crystal System               | monoclinic                                                       |
| Space Group                  | C2/c                                                             |
| $a/\text{\AA}$               | 28.9202(3)                                                       |
| $b/\text{\AA}$               | 15.7899(1)                                                       |
| $c/\text{\AA}$               | 29.9375(3)                                                       |
| $\alpha/^\circ$              | 90                                                               |
| $\beta/^\circ$               | 112.752(1)                                                       |
| $\gamma/^\circ$              | 90                                                               |
| $V/\text{\AA}^3$             | 12607.1(2)                                                       |
| $Z$                          | 8                                                                |
| $Z'$                         | 1                                                                |
| $\Theta_{min}/^\circ$        | 3.201                                                            |
| $\Theta_{max}/^\circ$        | 70.494                                                           |
| Measured Refl.               | 38088                                                            |
| Independent Refl.            | 11768                                                            |
| Reflections Used             | 10045                                                            |
| $R_{int}$                    | 0.0451                                                           |
| Parameters                   | 622                                                              |
| Restraints                   | 0                                                                |
| Largest Peak                 | 0.914                                                            |
| Deepest Hole                 | -0.489                                                           |
| GooF                         | 1.032                                                            |
| $wR_2$ (all data)            | 0.0589                                                           |
| $wR_2$                       | 0.0555                                                           |
| $R_1$ (all data)             | 0.0363                                                           |
| $R_1$                        | 0.0271                                                           |

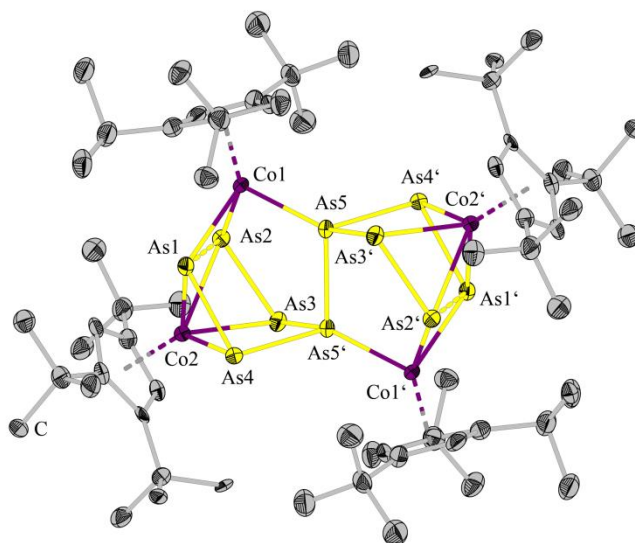

**Figure S6:** Molecular structure of **2\*4 CH<sub>2</sub>Cl<sub>2</sub>**. The H atoms and CH<sub>2</sub>Cl<sub>2</sub> solvent molecules are omitted for clarity. Anisotropic displacement parameters are depicted at 50% probability level.

#### Selected Bond Distances and Angles for **2\*4 CH<sub>2</sub>Cl<sub>2</sub>**

| Atom | Atom | Length/Å | Atom | Atom | Length/Å |
|------|------|----------|------|------|----------|
| As5  | As5' | 2.402(3) | As2  | Co1  | 2.351(3) |
| As5  | As4' | 2.424(2) | As1  | Co2  | 2.479(2) |
| As5  | As3' | 2.435(2) | As1  | Co1  | 2.349(3) |
| As5  | Co1  | 2.273(2) | As3  | As5' | 2.435(2) |
| As4  | As5' | 2.424(2) | As3  | Co2  | 2.447(2) |
| As4  | As1  | 2.379(2) |      |      |          |
| As4  | Co2  | 2.432(3) |      |      |          |
| As2  | As1  | 2.705(2) |      |      |          |
| As2  | As3  | 2.377(2) |      |      |          |
| As2  | Co2  | 2.465(3) |      |      |          |

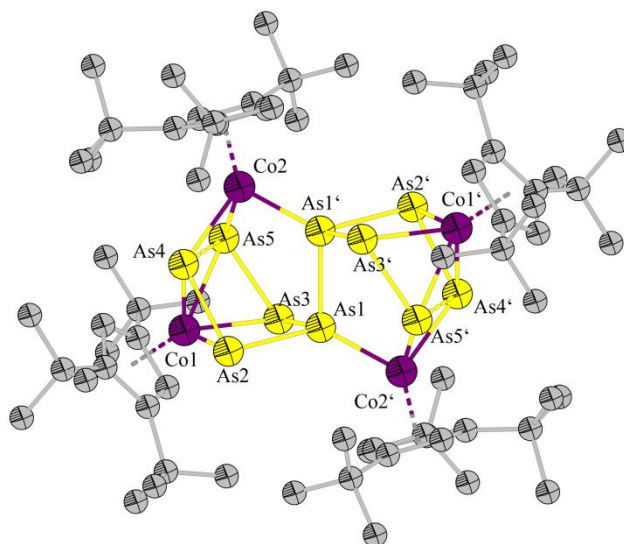

**Figure S7:** Molecular structure of **2**. The H atoms are omitted for clarity.

### Selected Bond Distances and Angles for **2**

|     |      |            |
|-----|------|------------|
| Co1 | As2  | 2.431(2)   |
| Co1 | As3  | 2.437(2)   |
| Co1 | As4  | 2.4763(19) |
| Co1 | As5  | 2.4656(19) |
| Co2 | As1' | 2.2816(15) |
| Co2 | As4  | 2.3476(18) |
| Co2 | As5  | 2.3448(18) |
| As1 | Co2' | 2.2816(15) |
| As1 | As1' | 2.4085(16) |
| As1 | As2  | 2.4265(14) |
| As1 | As3  | 2.4225(14) |
| As2 | As4  | 2.3673(14) |
| As3 | As5  | 2.3755(14) |
| As4 | As5  | 2.6723(19) |

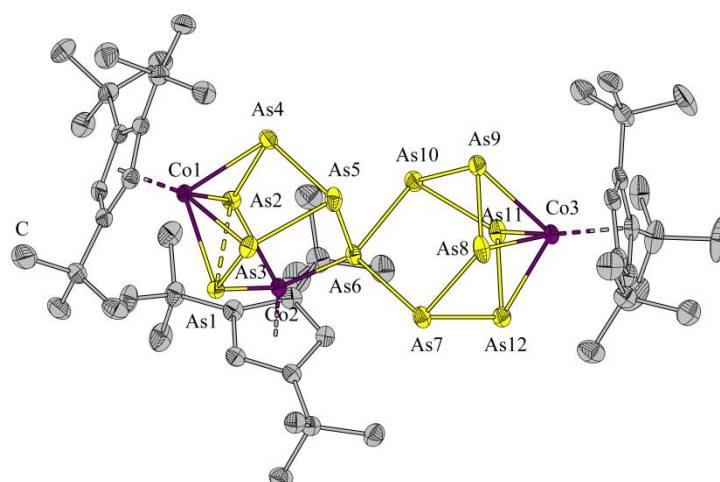

**Figure S8:** Molecular structure of **3**. The H atoms are omitted for clarity. Anisotropic displacement parameters are depicted at 50% probability level.

### Selected Bond Distances and Angles for **3**

|                     |                    |                    |                     |
|---------------------|--------------------|--------------------|---------------------|
| Co1 As1 2.4702(6)   | Co1 As2 2.4627(6)  | Co1 As3 2.4383(6)  | Co1 As4 2.4284(6)   |
| Co2 As1 2.3628(6)   | Co2 As2 2.3610(6)  | Co2 As6 2.2628(6)  | Co3 As8 2.4525(6)   |
| Co3 As9 2.4554(6)   | Co3 As11 2.4402(6) | Co3 As12 2.4423(6) | As1 As2 2.6684(5)   |
| As1 As3 2.3809(5)   | As2 As4 2.3821(5)  | As3 As5 2.4156(5)  | As4 As5 2.4350(6)   |
| As5 As6 2.4352(4)   | As6 As7 2.4312(5)  | As6 As10 2.4472(5) | As7 As8 2.4130(5)   |
| As7 As12 2.4282(5)  | As8 As9 2.3478(6)  | As9 As10 2.4277(6) | As10 As11 2.4288(5) |
| As11 As12 2.3638(6) |                    |                    |                     |

## References

- 1 O. J. Scherer, H. Sitzmann, G. Wolmershäuser, *J. Organomet. Chem.*, 1986, **309**, 77-86.
- 2 J. J. Schneider, D. Wolf, C. Janiak, O. Heinemann, J. Rust, C. Krüger, *Chem. Eur. J.*, 1998, **4**, 1982 - 1991.
- 3 O. V. Dolomanov, L. J. Bourhis, R. J. Gildea, J. A. K. Howard, H. Puschmann, *J. Appl. Cryst.*, 2009, **42**, 339-341.
- 4 A. Altomare, M. C. Burla, M. Camalli, G. L. Cascarano, C. Giacovazzo, A. Guagliardi, A. G. G. Moliterni, G. Polidori, R. Spagna, *J. Appl. Cryst.*, 1999, **32**, 115-119.
- 5 G. M. Sheldrick, *Acta Cryst.*, 2008, **A64**, 339-341.
- 6 P. Sluis, A. L. Spek, *Acta Cryst.*, 1990, **A46**, 194-201.
- 7 A.L.Spek, *J. Appl. Cryst.*, 2003, **36**, 7-13.
